# Supplementary material for: Artificial Intelligence Literacy and Educational Needs among Students at a Korean Medicine College: A Mixed-Methods Study
Source: Research Square preprint supplement (doi:10.21203/rs.3.rs-8525533/v1), 2026-02-23
Supplement: Supplementary file 1 [file 22b6cae7892eb57ea184b856.docx]

Appendix A. Questionnaire: AI Literacy and Educational Needs among Students of Korean Medicine

I. Demographic and Background Information

Q1. Gender

☐ Male  ☐ Female

Q2. Academic Year

☐ Premedical Year 1  ☐ Premedical Year 2  ☐ Medical Year 1  ☐ Medical Year 2  ☐ Medical Year 3  ☐ Medical Year 4

Q3. Age (years)

Q4. How would you rate your proficiency in using computers or digital devices?

① Very proficient ② Proficient ③ Average ④ Not proficient ⑤ Not at all proficient

Q5. Have you ever used any AI services? (e.g., ChatGPT, Naver Clova X, Gemini, etc.)

① Never used ② Used occasionally ③ Use frequently

II. Awareness and Experience of AI

Q6. I am well aware that AI technology is widely used in the medical field.

① Strongly disagree ② Disagree ③ Neutral ④ Agree ⑤ Strongly agree

Q7. Examples of AI applications include image analysis, diagnostic assistance, and medical-record automation.

① Strongly disagree ② Disagree ③ Neutral ④ Agree ⑤ Strongly agree

Q8. I have heard of cases in which AI has been used in Korean medical practice.

☐ I have seen actual studies or applications

☐ It was mentioned by professors or academic societies

☐ I read about it in news or media

☐ Never heard of it

Q9. AI technology has been mentioned in my coursework or clinical training.

☐ Yes  ☐ No

III. AI Literacy Competence and Attitude

Q10. I understand the basic concepts of medical AI (e.g., algorithms, machine learning, big data).

① Strongly disagree ② Disagree ③ Neutral ④ Agree ⑤ Strongly agree

Q11. I understand how AI technology is applied in clinical diagnosis or treatment.

① Strongly disagree ② Disagree ③ Neutral ④ Agree ⑤ Strongly agree

Q12. I believe that digital literacy and data interpretation skills are essential for utilizing medical AI.

① Strongly disagree ② Disagree ③ Neutral ④ Agree ⑤ Strongly agree

Q13. I think that Korean medicine doctors should be equipped with the ability to use AI technology.

① Strongly disagree ② Disagree ③ Neutral ④ Agree ⑤ Strongly agree

Q14. I have heard of the term “AI literacy” and understand its meaning.

☐ Never heard of it

☐ Heard of it but not sure what it means

☐ Have some understanding

☐ Understand it well

Q15. I recognize that AI information may be inaccurate or conflict with medical judgment.

① Strongly disagree ② Disagree ③ Neutral ④ Agree ⑤ Strongly agree

Q16. I believe that the clinician’s judgment is more important than AI’s results.

① Strongly disagree ② Disagree ③ Neutral ④ Agree ⑤ Strongly agree

IV. Applicability of AI in Korean Medicine

Q17. AI technology can assist in diagnosis in Korean medicine (e.g., tongue or facial image analyses).

① Strongly disagree ② Disagree ③ Neutral ④ Agree ⑤ Strongly agree

Q18. AI technology can also be applied to Korean medical treatments (e.g., prescription formulations and acupoint selection).

① Strongly disagree ② Disagree ③ Neutral ④ Agree ⑤ Strongly agree

Q19. I expect that AI technology will be increasingly used by Korean medicine doctors in clinical practice.

① Strongly disagree ② Disagree ③ Neutral ④ Agree ⑤ Strongly agree

Q20. I am ready to positively accept AI-assisted Korean medicine practice.

① Strongly disagree ② Disagree ③ Neutral ④ Agree ⑤ Strongly agree

V. Concerns and Expectations

Q21. I am concerned that AI may conflict with the individualization and intuitive diagnosis characteristic of Korean medicine.

① Strongly disagree ② Disagree ③ Neutral ④ Agree ⑤ Strongly agree

Q22. I think that AI use might reduce patient trust or diminish the authority of Korean medicine doctors.

① Strongly disagree ② Disagree ③ Neutral ④ Agree ⑤ Strongly agree

Q23. I believe that AI can ultimately serve as a tool to complement the clinical competence of Korean medicine doctors.

① Strongly disagree ② Disagree ③ Neutral ④ Agree ⑤ Strongly agree

Q24. I consider patient data protection to be very important when using AI in healthcare.

① Strongly disagree ② Disagree ③ Neutral ④ Agree ⑤ Strongly agree

Q25. I understand that even when AI provides diagnostic suggestions, the final decision is the responsibility of the clinician.

① Strongly disagree ② Disagree ③ Neutral ④ Agree ⑤ Strongly agree

VI. Educational Needs and Directions

Q26. AI-related content should be included in the Korean medicine curriculum.

① Strongly disagree ② Disagree ③ Neutral ④ Agree ⑤ Strongly agree

Q27. I have learned about AI-related topics in my coursework.

☐ Yes  ☐ No

Q28. Which types of AI-related courses should be included in the Korean medicine curriculum? (multiple responses are allowed)

Basic concepts and principles of medical AI

Fundamentals of medical data structure and interpretation

☐ Case analysis of Korean medicine clinical applications using AI

Practical training using medical AI tools (e.g., ChatGPT and clinical assist apps)

Ethical and legal issues related to AI use (e.g., data protection and accountability)

☐ Other: ____________________________

Q29. I am interested in career paths that combine AI and Korean medicine (e.g., digital healthcare, health AI startups).

☐ Yes  ☐ No  ☐ Not sure

VII. Open-Ended Questions

Q30. How do you expect AI technology to be utilized in Korean medicine?

Q31. If AI-related education is introduced in the Korean medicine curriculum, what form of instruction do you think would be the most effective? (Please describe your thoughts on timing, teaching methods, concerns, or expectations.)
