# Supplementary material for: Artificial Intelligence Literacy and Educational Needs among Students at a Korean Medicine College: A Mixed-Methods Study
Source: Research Square preprint supplement (doi:10.21203/rs.3.rs-8525533/v1), 2026-02-23
Supplement: Supplementary file 2 [file b303011f74e0bd57ac06d928.docx]

Appendix B. In-Depth Interview Questions

Part 1. Personal Background and Experience

Q1. Have You Ever Used Any AI Technologies or Services?

“If you have personally used AI services, for what purposes did you use them? For example, have you used AI for academic tasks, such as preparing assignments, creating presentations, studying for exams, or summarizing research papers?”

An)

Q2. Have AI ever been mentioned in Korean medicine classes or clinical training?

“During your coursework or clinical practice, has AI technology ever been discussed? If so, when and in what context is it mentioned?”

An)

Part 2. Understanding of AI Literacy

Q3. Have you ever heard of the term ‘AI literacy’?

“Have you ever heard the term ‘AI literacy’? If yes, how would you define or understand it?”

An)

Q5. What do you think should be done if the judgment made by an AI differs from that of a medical professional?

“If AI suggests a diagnosis that differs from the clinician’s judgment, how do you think a decision should be made?”

An)

Part 3. Integration of AI and Korean Medicine

Q6. Which areas do you think AI technology can be applied most effectively in Korean medicine?

“If AI were to be applied in Korean medicine, which areas would you think would benefit the most? Examples include diagnostic assistance, personalized prescriptions, treatment-outcome prediction, and automated patient interviews. Please explain your reasoning.”

An)

Q7. A survey on whether AI might conflict with the individuality or intuitive diagnosis of Korean medicine showed an equal proportion of ‘agree’ and ‘disagree responses. Why do you think this result is true?

An)

Q8. Another survey on whether AI use might reduce patient trust or diminish the authority of Korean medicine doctors also showed equal responses of ‘agree’ and ‘disagree. ’ Why do you think this result occurred?

An)

Q9. Do you think that using AI in clinical practice will be natural for a future Korean medicine doctor? Which areas or applications do you personally like to use?

An)

Part 4. Ethical awareness and responsibility

Q10. What concerns you most about applying AI technology in healthcare?

“When AI is used in medical settings, what aspects are you most concerned about? For example, data privacy, diagnostic errors, or changes in the doctor–patient relationship.”

An)

Part 5. Educational direction and suggestions

Q11. Do you think AI-related content is sufficiently covered by the current Korean medicine curriculum?

“Do you think AI-related education is necessary in the Korean medicine curriculum? If so, do you feel that this issue is adequately addressed at present?”

An)

Q12. If an integrated AI and Korean medicine education program were to be introduced, what course format would you think would be most effective?

“If a program combining AI and Korean medicine were newly introduced, what teaching format would you think would work best—online, formal lectures, hands-on practice, or theoretical classes? Please share your suggestions regarding the content and instructional methods.”

An)

Q13. What competencies do you think are important for Korean medical doctors in the age of AI?

“In an era of expanding AI applications, what abilities or attitudes should Korean medical doctors possess to effectively utilize AI in clinical practice?”

An)

Q14. Finally, is there anything else you would like to share regarding AI and Korean medicine beyond what we have discussed today?

An)
